# Supplementary material for: Ferrocene–quinoxaline Y-shaped chromophores as fascinating second-order NLO building blocks for long lasting highly active SHG polymeric films
Source: Royal Society of Chemistry journal article supplement (doi:10.1039/c6dt01590e), 2016-01-01
Supplement: c6dt01590e1.pdf [file c6dt01590e1.pdf]

## Electronic Supplementary Information

### **Ferrocene-quinoxaline Y-shaped chromophores as fascinating second-order NLO building blocks for long lasting highly active SHG polymeric films**

Kabali Senthilkumar,<sup>a</sup> Krishnan Thirumoorthy,<sup>a</sup> Claudia Dragonetti,<sup>b,c</sup> Daniele Marinotto,<sup>b</sup> Stefania Righetto,<sup>b</sup> Alessia Colombo,<sup>b\*</sup> Matti Haukka,<sup>d</sup> Nallasamy Palanisami<sup>a\*</sup>

a. Department of Chemistry, School of Advanced Sciences, VIT University, Vellore 632014, Tamilnadu, India.

b. Department of Chemistry and Centro CIMAINA, University of Milan, INSTM-Research Unit, Via C. Golgi 19, 20133 Milan, Italy.

c. ISTM-CNR via Golgi 19 Milan, Italy

d. Department of Chemistry, University of Jyväskylä, P.O. Box 35, FI-40014 Jyväskylä, Finland.

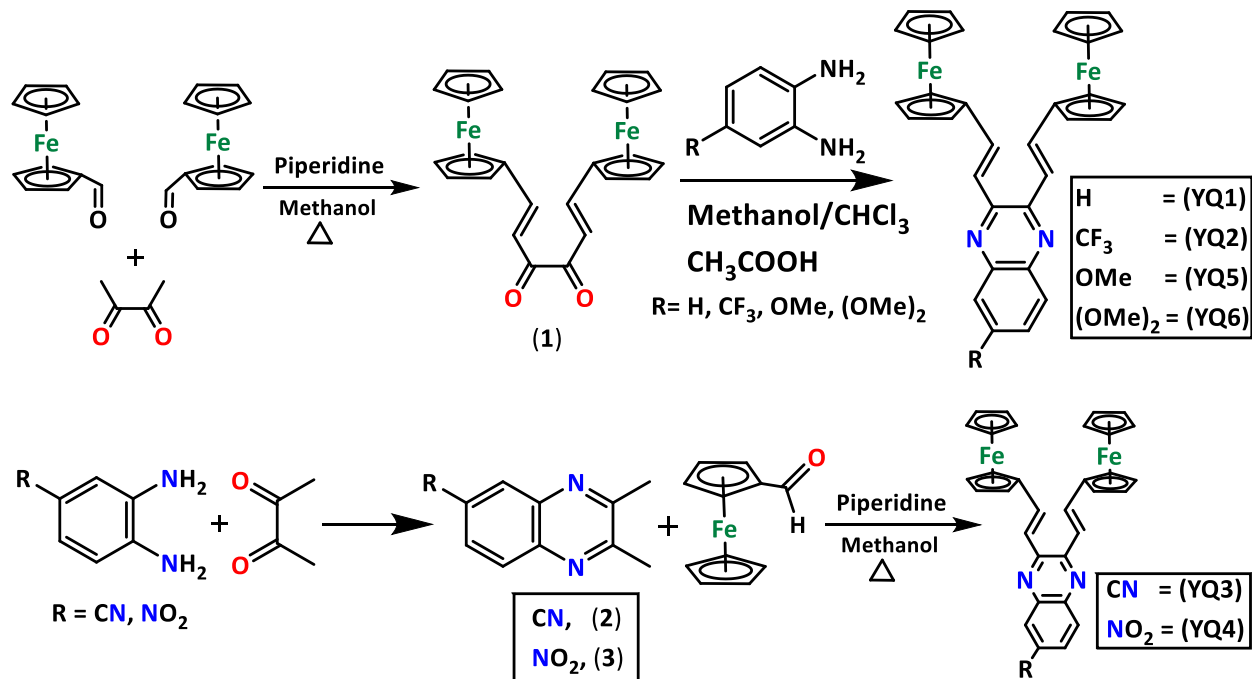

**Scheme 1.** Synthetic routes for different substituted Y-shaped quinoxaline chromophores (**YQ1-6**)

## EXPERIMENTAL

### Materials and Procedures

The (1*E*,5*E*)-1,6-Bisferrocenyl-hexa-1,5-diene-3,4-dione (**1**) were synthesized from reported procedure.<sup>1,2</sup> Products were dried overnight in a vacuum desiccator (CaCl<sub>2</sub>) before to be characterized. Chromatographic separations were carried out using silica gel 60 (AVRA, 100 – 120 mesh). Other solvents were of reagent grade and were used without further purification. All other chemicals were purchased from M/s. Aldrich Chemical Co. And M/s. Johnson Matthey Chemicals. The condensation of an (1*E*,5*E*)-1,6-Bisferrocenyl-hexa-1,5-diene-3,4-dione (**1**) with an substituted 1,2-diamine (R= H, CF<sub>3</sub>, OMe and (OMe)<sub>2</sub>) is one of the most versatile methods used for the construction of quinoxaline derivatives **YQ1**, **YQ2**, **YQ5**, **YQ6** as shown in scheme 1. Remaining derivatives **YQ3** and **YQ4** are synthesized by different synthetic strategy as shown in the scheme 1. Starting from the corresponding derivatives **2-4** (synthesized by condensation

reaction of cyano and nitro substituted 1,2-diamine and 2,3-butadione) and ferrocenecarboxaldehyde in the presence of piperidine and methanol as solvent, the target compounds **YQ3** and **YQ4** were prepared through a Knoevenagel condensation.

### **General Physical Measurements**

The NMR spectra were recorded on a BRUKER (400 MHz) spectrometer. Chemical shifts are reported in  $\delta$  (ppm) and mass spectra were recorded on a Q-Tof-Mass Spectrometer and JEOL-AccuTOF JMS-T100LC mass spectrometer (Jeol, Tokyo, Japan) fitted with a DART ion source. Micro elemental analyses were determined by PERKIN-ELMER CHN-2400. Infrared (FT-IR) spectra were recorded on a BRUKER VERTEX 70 attenuated total reflection-Fourier transform infrared (ATR-FTIR) spectrometer. All UV-visible absorption spectra were recorded on a Varian Cary Bio UV 100 UV-visible spectrophotometer in a 1 cm<sup>2</sup> quartz cuvette at room temperature using CH<sub>2</sub>Cl<sub>2</sub> solvent. The films thickness was determined using a Bruker DektakXT profilometer. The SEM images were recorded with an Hitachi TM-1000 Tabletop Microscope.

### **Single-crystal X-ray structure determination of chromophores (YQ1 and YQ2)**

All crystals were obtained by a slow evaporation of the corresponding solutions (CH<sub>2</sub>Cl<sub>2</sub> and MeOH) at room temperature. Crystals were stored in paraffin-oil and mounted in a MiTeGenloop, and measured at 100 to 120 K. The crystal approximate dimensions are 0.25 x 0.05 x 0.03 mm<sup>3</sup> (for **YQ1**), 0.30 x 0.30 x 0.25 mm<sup>3</sup> (for **YQ2**). The X-ray diffraction data were collected on a Agilent SuperNova (Oxford Diffraction) diffractometer using Mo-K <sub>$\alpha$</sub>  radiation ( $\lambda=0.71073$  Å) for **YQ1** and Bruker axs kappa apex2 CCD Diffractometer using Mo-K <sub>$\alpha$</sub>  radiation ( $\lambda=0.71073$  Å) for **YQ2**. The Apex2<sup>3</sup> package was used for cell refinements and data reductions. The structures were solved by direct methods using the Shelxs 97<sup>4</sup> or Superflip<sup>5</sup> program with

the Olex 2<sup>6</sup> graphical user interface. Structural refinements were carried out using Shelxl-97 or Shelxl-2014.<sup>4,7</sup>

The positions of all the atoms were obtained by direct methods. All non-hydrogen atoms were refined anisotropically. Hydrogen atoms were positioned geometrically and were also constrained to ride on their parent atoms, with C – H = 0.95 – 0.100 Å, and  $U_{\text{iso}} = 1.2 - 1.5U_{\text{eq}}$  (parent atom). The crystallographic details are summarized in Table S1.

### **EFISH measurements**

All of the EFISH measurements<sup>8</sup> were carried out in CHCl<sub>3</sub> solutions at 10<sup>-3</sup> M concentration, with a non-resonant incident wavelength of 1.907 μm, obtained by Raman-shifting the fundamental 1.064 μm wavelength produced by a Q-switched, mode-locked Nd<sup>3+</sup>:YAG laser manufactured by Atalaser. The apparatus used for EFISH measurements is a prototype made by SOPRA (France). The  $\mu\beta_{\text{EFISH}}$  values reported are the mean values of 16 measurements performed on the same sample. The sign of  $\mu\beta$  is determined by comparison with the solvent (CHCl<sub>3</sub>). All measurements are negative, this means that  $\Delta\mu_{\text{eg}}$  is negative (e=excited, g= ground state).

### **Preparation of thin films of chromophores in PMMA and polystyrene related SHG measurements**

Composite films were produced by spin coating on ordinary non-pretreated glass substrates (thickness 1 mm) previously cleaned with water/acetone. The solution was obtained from 300 mg of polymer, polymethylmethacrylate (PMMA) or polystyrene (PS) and 15 mg of **YQ2** dissolved in dichloromethane (4.5 mL). Parameters of spinning (RPM revolutions per minute) RPM 1:500; Ramp 1:1 s, Time 1:3 s; RPM 2:1500; Ramp 2:4 s, Time 2:25 s; RPM 3:2000; Ramp 3:1 s, Time 3:1 s. The film thickness of composite PMMA (or) polystyrene/**YQ2** was

measured by the profilometer. Second Harmonic Generation (SHG) experiments were performed using a Q-switched Nd:YAG (Quanta System Giant G790-20) laser at 1.064  $\mu\text{m}$  wavelength with a pulse of 7 ns and 20 Hz repetition rate. For poling measurements, the fundamental beam was attenuated to 0.57 mJ and was focused with a lens ( $f = 600$  mm) on the sample, placed over the hot stage. The corona poling process was carried out inside a specially built dry box, in  $\text{N}_2$  atmosphere. The fundamental beam was polarized in the plane of incidence (p-polarized) with an angle of about  $55^\circ$  with respect to the sample in order to optimize the SHG signal. The hot stage temperature was controlled by a GEFTRAN 800 controller, while the corona wire voltage (up to 10.0 kV across a 10 mm gap) was applied by a TREK610E high-voltage-supply. After rejection of the fundamental beam by an interference filter and a glass cut-off filter, the p-polarized SHG signal at 532 nm was detected with a UV-Vis photomultiplier (PT) Hamamatsu C3830.<sup>9-14</sup>

The corona wire poling dynamics of the SHG behavior of polystyrene and PMMA composite film was performed using the following parameters: temperature and electric field, of  $75^\circ\text{C}$  and 10 kV for complex **YQ2**/polystyrene film and  $65^\circ\text{C}$  and 9.5 kV for complex YQ2/PMMA film; these conditions allowed us to obtain a sufficiently high and stable second-harmonic generation (SHG) signal. The absorption bands of **YQ2** in polystyrene and in PMMA films (peaks at 356 nm and 522nm) after poling (blue line) decrease compared to that observed before poling (black line). It's the "so-called" dichroic effect<sup>15</sup> due to the partial orientation of molecules along the direction of the electric poling field. No appreciable Stark shift<sup>15</sup> of the absorption peaks was noted after poling as shown in Fig. S1.

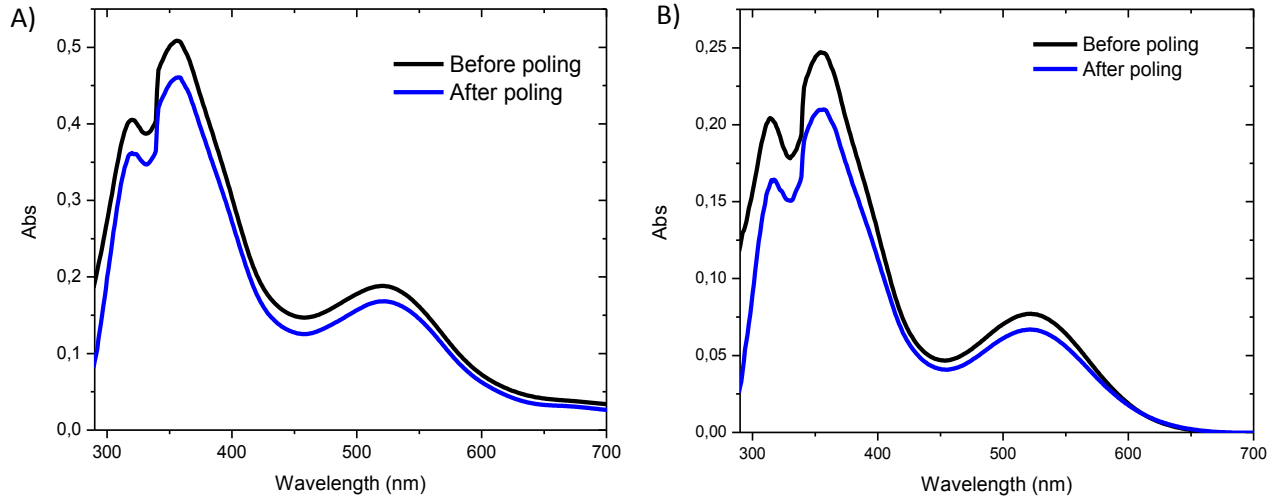

**Figure S1:** UV/Vis absorption spectra of YQ2 in A) polystyrene and B) PMMA matrix after and before poling.

### Method of calculation of the $d_{33}$ values

In the Maker fringe experiment, the second harmonic (SH) intensity was detected as a function of the incidence angle  $\theta$  of the fundamental beam and normalized with respect to that of a calibrated quartz crystal wafer (X-cut) 1 mm thick whose  $d_{11}$  is 0.46 pm/V. The incidence angle was changed by rotating the poled film along the Y axis (see Fig. S2) while the polarization of the fundamental and SH beam could be changed by a half-wave plate and a cube beam splitter respectively.

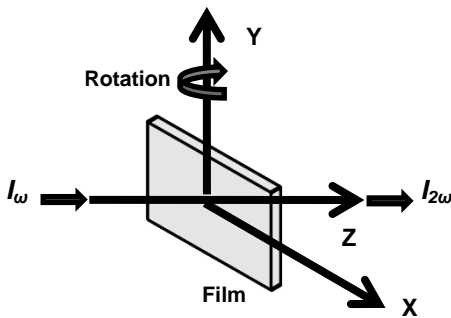

**Figure S2:** Maker Fringe. (XYZ is the macroscopic coordinate system).

In order to determine the nonzero independent components of the susceptibility tensor for poled films ( $C_{\infty v}$  symmetry) Maker fringe measurements were conducted with the following polarizations:  $p \rightarrow p$ ,  $s \rightarrow p$  and  $45 \rightarrow s$ . The standard expression<sup>13</sup> used to fit the SHG intensity in a Maker fringe measurement includes the absorption coefficient of the film at the harmonic frequency. In this expression the SHG intensity is proportional to the square of the effective nonlinear optical coefficient ( $d_{eff}$ ) which depends on polarizations of the fundamental and SH beam. Considering the  $C_{\infty v}$  symmetry expected for poled films and the polarizations of the fundamental and SH beam, the coefficient  $d_{eff}$  assumes the following expression:

$$d_{eff} = d_{zxx} \sin \vartheta_2 \quad (1a)$$

for  $s \rightarrow p$  configuration,

$$d_{eff} = d_{xxz} \sin \vartheta_1 \quad (1b)$$

for  $45 \rightarrow s$  configuration,

$$d_{eff} = 2d_{xxz} \sin \vartheta_1 \cos \vartheta_1 \cos \vartheta_2 + \sin \vartheta_2 (d_{zxx} \cos^2 \vartheta_1 + d_{zzz} \sin^2 \vartheta_1) \quad (1c)$$

for  $p \rightarrow p$  configuration, where  $\theta_1$  and  $\theta_2$  are respectively the angles of refraction inside the poled film for the fundamental and SH beam with refractive indices  $n_{\omega}$  and  $n_{2\omega}$  ( $\sin \theta_m = \sin \theta / n_{m\omega}$ ,  $m=1,2$ ).

### **Morphological investigations by SEM measurements**

Thin films morphology was analysed by scanning electron microscopy (SEM) covering a large area of the samples. The composite films seem to consist in smooth basal layers with few small droplets randomly distributed on the surface but overall the films (in particular B) are compact and uniformly grown (see Fig. S3).

**A)**

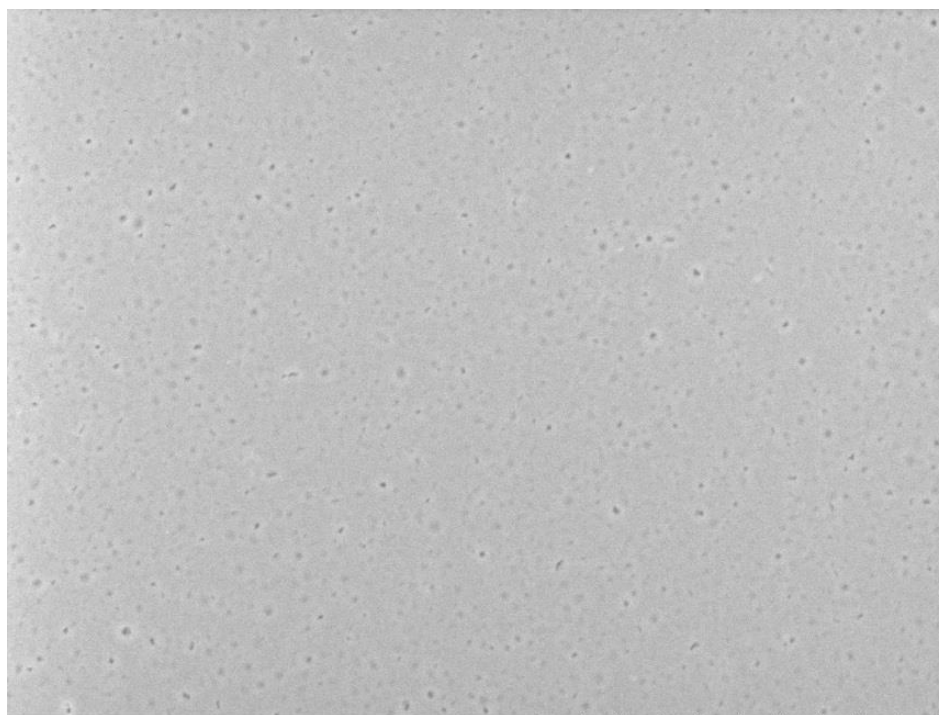

7polysty0002

L D3.1 x800 100 um

**B)**

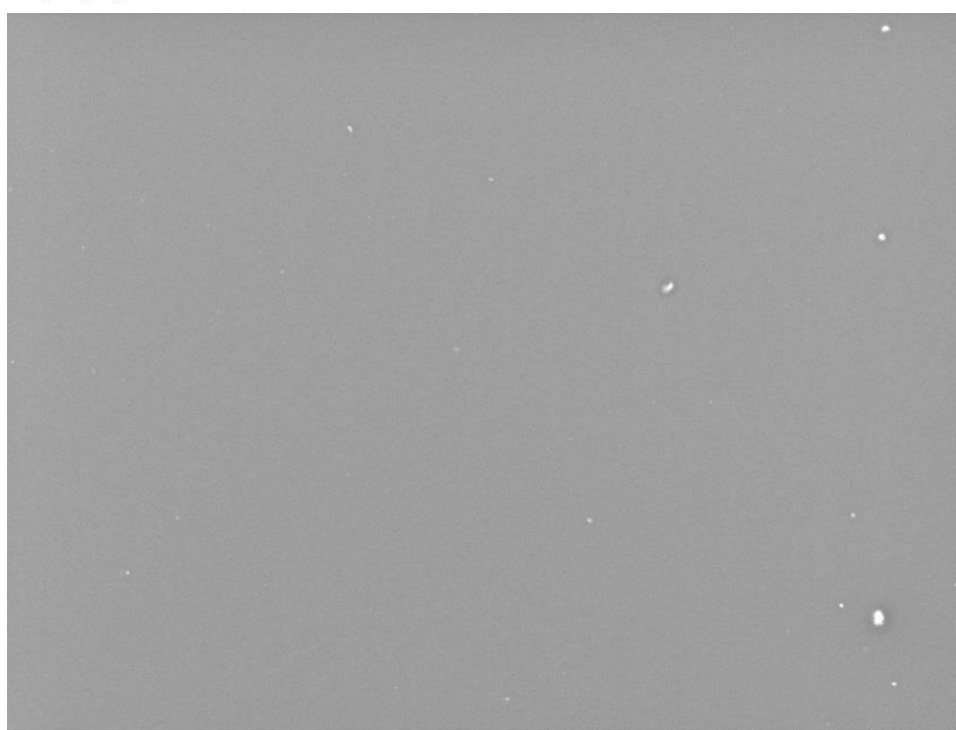

4PPMA0001

L D3.0 x800 100 um

**Figure S3.** SEM image of A) Polystyrene and B) PMMA thin films.



## Theoretical Calculations

The electronic structures and molecular properties of Y shaped quinoxaline chromophores were investigated using density functional theory (DFT) to understand bonding patterns, the electronic charge and molecular orbital energy distributions. The initial geometry of chromophore was taken from the available crystal data for **YQ1** and **YQ2**. The guess structures of remaining chromophores were obtained by replacing the substitution in the phenyl ring corresponding position in **YQ1**. The geometries of synthesized chromophores in the gas phase were optimized using Becke's three-parameter and Lee-Yang-Parr functional as B3LYP.<sup>16-18</sup> The DFT/B3LYP level of computational calculations were carried out using 6-31+G\*\* basis set for finding the global minimum energy structure of all chromophores and its molecular properties calculations. Inclusion of diffusion and polarization functions in 6-31+G\*\* basis set accounts the electronic charge distributions and effects of polarization in atomic orbitals in all quinoxaline chromophores. In addition, time-dependent density functional (TD-DFT) theoretical method was utilized for finding the molecular orbital energy distributions within the first 20 excited singlet states. On the optimized gas phase geometries, TD-DFT studies have been carried out with B3LYP/6-31+G\*\* method, both in *vacuo* and in CH<sub>2</sub>Cl<sub>2</sub> using PCM model of solvation method. All computation calculations were performed using the G09 package.<sup>19</sup> Electronic geometries, frontier molecular orbital structures were taken using GaussView 5<sup>20</sup> molecular visualization program.

## Synthesis of quinoxaline Derivatives (YQ1, YQ2, YQ5 and YQ6)

Solution of **1** (0.478 g, 1 mmol) in chloroform was added to a methanolic solution of diamine (1 mmol) and followed by acetic acid (0.5 mL) was added and the reaction mixture was refluxed overnight. The completion of the reaction was monitored through thin layer chromatography.

The solvent was removed in a rotary evaporator and the residue was poured in water and separated with chloroform and solvent was removed. The crude product was purified through silica gel thin layer chromatography using ethyl acetate/hexane as the eluent.

### **2,3-bis((E)-2-ferrocenylstyryl)-quinoxaline (YQ1)**

*o*-Phenylenediamine, (0.108 g, 1 mmol), yield 84 %. mp = 198 °C. C<sub>32</sub>H<sub>26</sub>Fe<sub>2</sub>N<sub>2</sub>: calcd. C, 69.85; H, 4.76; N, 5.09; found C, 69.32; H, 4.81; N, 5.78 %. TOF MS (ESI): *m/z* (M<sup>+</sup>) = 550. <sup>1</sup>H NMR (400 MHz, Chloroform-d) δ 7.93 (dd, *J* = 6.3, 3.5 Hz, 2H), 7.74 (d, *J* = 15.3 Hz, 2H), 7.62 – 7.53 (t, 2H), 7.13 (d, *J* = 15.3 Hz, 2H), 4.57 (t, *J* = 1.9 Hz, 4H), 4.36 (t, *J* = 1.9 Hz, 4H), 4.15 (s, 10H) ppm. FTIR: 3074(m), 3051(m), 2962(s), 1616(s), 1512(s), 1400(s), 1303(s), 1261(s), 1199(s), 1099(s), 958(s), 800(s), 756(s), 609(s), 474(s) cm<sup>-1</sup>.

### **2,3-bis((E)-2-ferrocenylstyryl)-6-(trifluoromethyl)quinoxaline (YQ2)**

4-(trifluoromethyl)benzene-1,2-diamine, (0.176 g, 1 mmol), yield 81%. mp = 206 °C. C<sub>33</sub>H<sub>25</sub>F<sub>3</sub>Fe<sub>2</sub>N<sub>2</sub>: calcd. C, 64.11; H, 4.08; N, 4.53; found C, 63.98; H, 4.01; N, 4.28 %. TOF MS (ESI): *m/z* (M<sup>+</sup>) = 618. <sup>1</sup>H NMR (400 MHz, Chloroform-d) δ 8.23 (s, 1H), 8.00 (d, *J* = 8.7 Hz, 1H), 7.82 (d, *J* = 15.3 Hz, 2H), 7.70 (d, *J* = 8.7 Hz, 1H), 7.08 (d, *J* = 15.3 Hz, 2H), 4.59 – 4.54 (s, 4H), 4.38 (s, 4H), 4.14 (s, 10H) ppm. <sup>19</sup>F NMR (377 MHz, Chloroform-d): δ -62.46 (s, -CF<sub>3</sub>) ppm. FTIR: 3089(m), 2920(s), 2846(m), 1616(s), 1514(s), 1404(m), 1284(s), 1191(s), 1155(m), 1105(s), 1055(s), 956(s), 893(m), 810(s), 692(m), 576(m), 511(s), 480(s) cm<sup>-1</sup>.

### **2,3-bis((E)-2-ferrocenylstyryl)-6-methoxyquinoxaline (YQ5)**

4-methoxybenzene-1,2-diamine, (0.138 g, 1 mmol), yield 86%. mp = 285 °C. C<sub>33</sub>H<sub>28</sub>Fe<sub>2</sub>N<sub>2</sub>O: calcd. C, 68.30; H, 4.86; N, 4.83; found C, 68.14; H, 4.75; N, 4.76 %. TOF MS (ESI): *m/z* (M<sup>+</sup>) = 581.4. <sup>1</sup>H NMR (400 MHz, Chloroform-d) δ 7.72 (s, 1H), 7.68 (d, *J* = 7.1 Hz, 1H), 7.62 (d, *J* =

15.4 Hz, 2H), 7.27 (d,  $J = 7.9$  Hz, 1H), 7.06 (d,  $J = 14.6$  Hz, 2H), 4.58 (t, 4H), 4.37 (t, 4H), 4.15 (s, 10H), 3.91 (s, 1H) ppm. FTIR: 3072(m), 2962(s), 2920(m), 2846(m), 1733(m), 1612(s), 1517(m), 1489(s), 1438(m), 1313(m), 1261(s), 1215(s), 1101(s), 1024(s), 962(s), 798(s), 748(s), 611(s), 520(s), 480(s), 420(s)  $\text{cm}^{-1}$ .

### **2,3-bis((E)-2-ferrocenylstyryl)-6,7-dimethoxyquinoxaline (YQ6)**

4,5-dimethoxybenzene-1,2-diamine, (0.168 g, 1 mmol), yield 74%. mp =  $>300^{\circ}\text{C}$ .  $\text{C}_{34}\text{H}_{30}\text{Fe}_2\text{N}_2\text{O}_2$ : calcd. C, 66.91; H, 4.95; N, 4.59; found C, 66.71; H, 4.34; N, 4.86 %. TOF MS (ESI):  $m/z$  ( $\text{M}^+$ ) = 611.4.  $^1\text{H}$  NMR (400 MHz, Chloroform- $d$ )  $\delta$  7.61 (d,  $J = 15.4$  Hz, 2H), 7.23 (s, 2H), 7.12 (d,  $J = 15.4$  Hz, 2H), 4.55 (t,  $J = 1.9$  Hz, 4H), 4.33 (t,  $J = 1.9$  Hz, 4H), 4.14 (s, 10H), 4.00 (s, 6H) ppm. FTIR: 3078(m), 3001(m), 2952(m), 2827(m), 1620(s), 1492(s), 1429(m), 1307(s), 1218(s), 1166(s), 1105(m), 1018(m), 970(m), 817(m), 615(s), 499(s), 480(s), 437(m)  $\text{cm}^{-1}$ .

### **2,3-dimethyl-6-cyanoquinoxaline (2) and 2,3-dimethyl-6-nitroquinoxaline (3)**

A mixture of 4-nitrobenzene-1,2-diamine/3,4-diaminobenzonitrile (1 mmol), 2,3-butadione (1 mmol) and absolute ethanol/acetic acid (5 ml/0.5 ml) was refluxed until completion of the reaction. The reaction was monitored by thin layer chromatography. After the reaction was completed the mixture was poured into the water, precipitated products was filtered and dried. The pure product was afforded by recrystallization. **2**; MS (EI):  $m/z$  ( $\text{M}^+$ ) = 183.31. **3**; MS (EI):  $m/z$  ( $\text{M}^+$ ) = 203.20.

### **2,3-bis((E)-2-ferrocenylstyryl)-6-cyanoquinoxaline (YQ4)**

A mixture of **2** (0.091 g, 0.5 mmol), FcCHO (0.214g, 1 mmol) and a small portion of piperidine in anhydrous toluene (10 ml) was refluxed under a  $\text{N}_2$  atmosphere. The reaction was confirmed using thin layer chromatography. After cooling to room temperature, the remaining liquid was

concentrated and purified by column chromatography on silica gel using hexane/ethylacetate (9:1) as eluent to produce a solid product. yield 74%. mp = 197 °C. C<sub>33</sub>H<sub>25</sub>Fe<sub>2</sub>N<sub>3</sub>: calcd. C, 68.90; H, 4.38; N, 7.30; found C, 68.86; H, 4.27; N, 7.63 %. TOF MS (ESI):  $m/z$  (M<sup>+</sup>) = 576.68. <sup>1</sup>H NMR (400 MHz, Chloroform-d) δ 8.27 (s, 1H), 7.96 (d,  $J$  = 8.6 Hz, 1H), 7.85 (d,  $J$  = 15.2 Hz, 2H), 7.68 (d,  $J$  = 1.8 Hz, 1H), 7.05 (d,  $J$  = 8.3 Hz, 2H), 4.59 (t, 4H), 4.44 (t, 4H), 4.16 (s, 10H) ppm. FTIR: 3074(m), 2918(s), 2848(m), 2225(s), 1679(s), 1620(s), 1541(s), 1398(s), 1375(m), 132(m), 1241(m), 1120(m), 1105(m), 999(m), 960(s), 908(m), 812(m), 634(m), 613(s), 497(s), 478(s) cm<sup>-1</sup>.

### **2,3-bis(*E*)-2-ferrocenylstyryl)-6-nitroquinoxaline (YQ3)**

A mixture of **3** (0.102 g, 0.5 mmol), FcCHO (0.214 g, 1 mmol) and a small portion of piperidine in anhydrous toluene (10 ml) was refluxed under a N<sub>2</sub> atmosphere. The reaction was confirmed using thin layer chromatography. After cooling to room temperature, the remaining liquid was concentrated and purified by column chromatography on silica gel using hexane/ethylacetate (9:1) as eluent to produce a solid product. Yield 74%. mp = 208-210 °C. C<sub>32</sub>H<sub>25</sub>Fe<sub>2</sub>N<sub>3</sub>O<sub>2</sub>: calcd. C, 64.57; H, 4.23; N, 7.06; found C, 64.19; H, 4.42; N, 7.61 %. <sup>1</sup>H NMR (400 MHz, Chloroform-d) δ 8.76 (d,  $J$  = 2.6 Hz, 1H), 8.34 (d,  $J$  = 2.6 Hz, 1H), 8.01 (d,  $J$  = 4.3 Hz, 2H), 7.97 (d,  $J$  = 7.7 Hz, 1H), 6.94 (d,  $J$  = 15.2 Hz, 2H), 4.58 (s, 4H), 4.43 (s, 4H), 4.15 (s, 10H) ppm. FTIR: 3089(m), 2922(m), 2848(w), 1679(s), 1616(s), 1517(s), 1398(s), 1330(s), 1244(s), 1105(s), 1001(s), 960(s), 902(s), 815(s), 738(s), 702(s), 621(s), 478(s) cm<sup>-1</sup>.

**Table S1.** Crystallographic data and structure refinement details for **YQ1** and **YQ2**.

| Identification code                     | <b>YQ1</b>                                                     | <b>YQ2</b>                                                                    |
|-----------------------------------------|----------------------------------------------------------------|-------------------------------------------------------------------------------|
| CCDC                                    | 1440374                                                        | 1440375                                                                       |
| Empirical formula                       | C <sub>32</sub> H <sub>26</sub> Fe <sub>2</sub> N <sub>2</sub> | C <sub>33</sub> H <sub>25</sub> F <sub>3</sub> Fe <sub>2</sub> N <sub>2</sub> |
| Formula weight                          | 550.25                                                         | 618.25                                                                        |
| Temperature, K                          | 120(2)                                                         | 293(2)                                                                        |
| Wavelength, Å                           | 1.54184                                                        | 0.71073                                                                       |
| Crystal system                          | Monoclinic                                                     | Triclinic                                                                     |
| Space group                             | P2 <sub>1</sub> /c                                             | P-1                                                                           |
| a, Å                                    | a = 5.88(11)                                                   | a = 7.35(11)                                                                  |
| b, Å                                    | b = 17.93(4)                                                   | b = 11.91(17)                                                                 |
| c, Å                                    | c = 22.87(4)                                                   | c = 15.84(2)                                                                  |
| a, °                                    | 90                                                             | 82.43(8)                                                                      |
| b, °                                    | 94.53                                                          | 80.52(8)                                                                      |
| g, °                                    | 90                                                             | 73.27(8)                                                                      |
| Volume Å <sup>3</sup>                   | 2405.58(8)                                                     | 1306.6(3)                                                                     |
| Z                                       | 4                                                              | 2                                                                             |
| Density (calculated) Mg/m <sup>3</sup>  | 1.519                                                          | 1.571                                                                         |
| Absorption coefficient mm <sup>-1</sup> | 9.850                                                          | 1.159                                                                         |
| F(000)                                  | 1136                                                           | 632                                                                           |
| Crystal size mm <sup>3</sup>            | 0.25 x 0.05 x 0.03                                             | 0.30 x 0.30 x 0.25                                                            |
| Theta range for data collection         | 3.134 to 77.057                                                | 1.308 to 24.345                                                               |
| Reflections collected                   | 32178                                                          | 20285                                                                         |
| Data / restraints / parameters          | 5084 / 0 / 325                                                 | 20285 / 159 / 391                                                             |
| Goodness-of-fit on F <sup>2</sup>       | 1.016                                                          | 1.083                                                                         |
| Final R indices [I>2σ(I)]               | R <sub>1</sub> = 0.0469, wR <sub>2</sub> = 0.1255              | R <sub>1</sub> = 0.1099, wR <sub>2</sub> = 0.2791                             |
| R indices (all data)                    | R <sub>1</sub> = 0.0502, wR <sub>2</sub> = 0.1292              | R <sub>1</sub> = 0.1494, wR <sub>2</sub> = 0.3022                             |

**Table S2.** Important geometrical parameters for crystal structure of **YQ1** and **YQ2**. The interatomic distances are reported in Å, angels in degrees.

|                               | <b>YQ1</b> | <b>YQ2</b>  |
|-------------------------------|------------|-------------|
| Average Fe(1)-C               | 2.056(4)   | 2.045(4)    |
| Average Fe(2)-C               | 2.047(8)   | 2.017(7)    |
| Fe(1)-Cent(1)                 | 1.662(4)   | 1.644(3)    |
| Fe(1)-Cent(2)                 | 1.661(5)   | 1.646(8)    |
| Fe(2)-Cent(1)                 | 1.647(2)   | 1.637(2)    |
| Fe(2)-Cent(1)                 | 1.653(8)   | 1.633(7)    |
| Fe(1)-Fe(2)                   | 9.898(1)   | 9.393(3)    |
| Fc(1) Cent(1)- Cent(2)        | 3.300(9)   | 3.291(7)    |
| Fc(2) Cent(1)- Cent(2)        | 3.322(3)   | 3.270(1)    |
| Cent(1)-Fe(1)-Cent(2)         | 177.09(1)  | 177.44(3)   |
| Cent(1)-Fe(2)-Cent(2)         | 179.17(2)  | 179.20(6)   |
| N(1)-C(13)-C(12)-C(11) $\phi$ | 7.079(34)  | 8.72(23)    |
| N(2)-C(20)-C(21)-C(22) $\phi$ | -1.521(3)  | -10.64(24)  |
| N(2)-C(20)-C(13)-C(12) $\phi$ | 177.32(1)  | -176.67(41) |
| N(1)-C(13)-C(20)-C(21) $\phi$ | -178.24(2) | -179.25(14) |

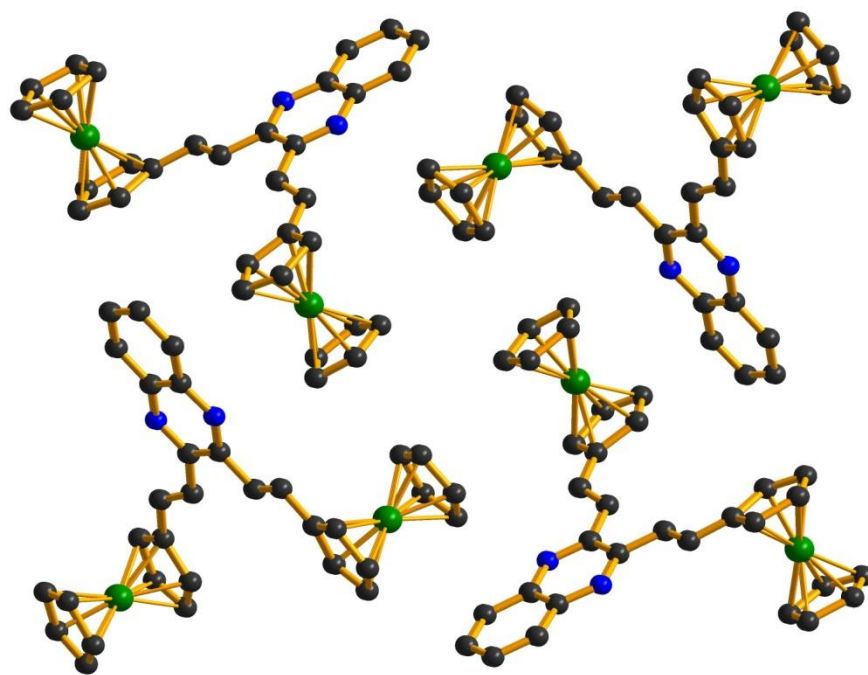

**Figure S4.** Crystal packing arrangement in YQ1.

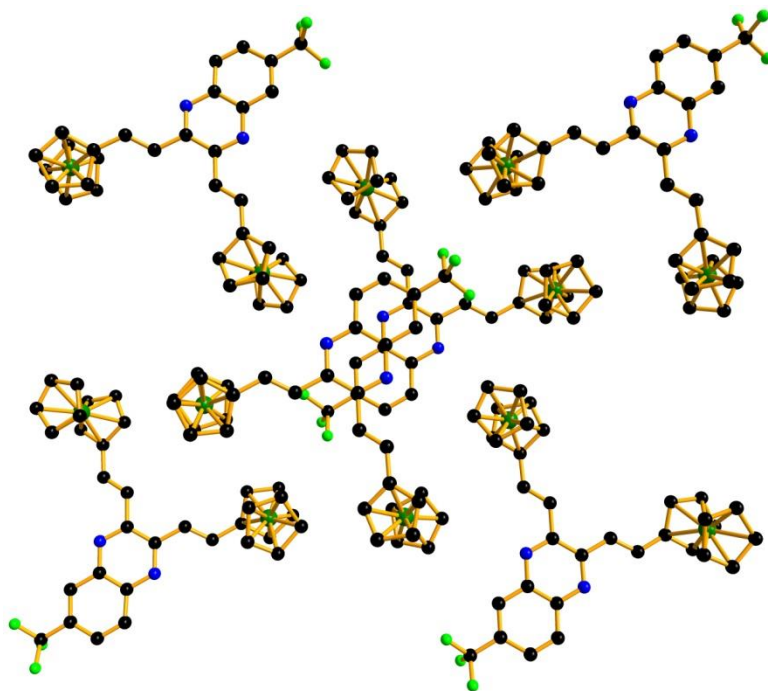

**Figure S5.** Crystal packing arrangement in YQ2.

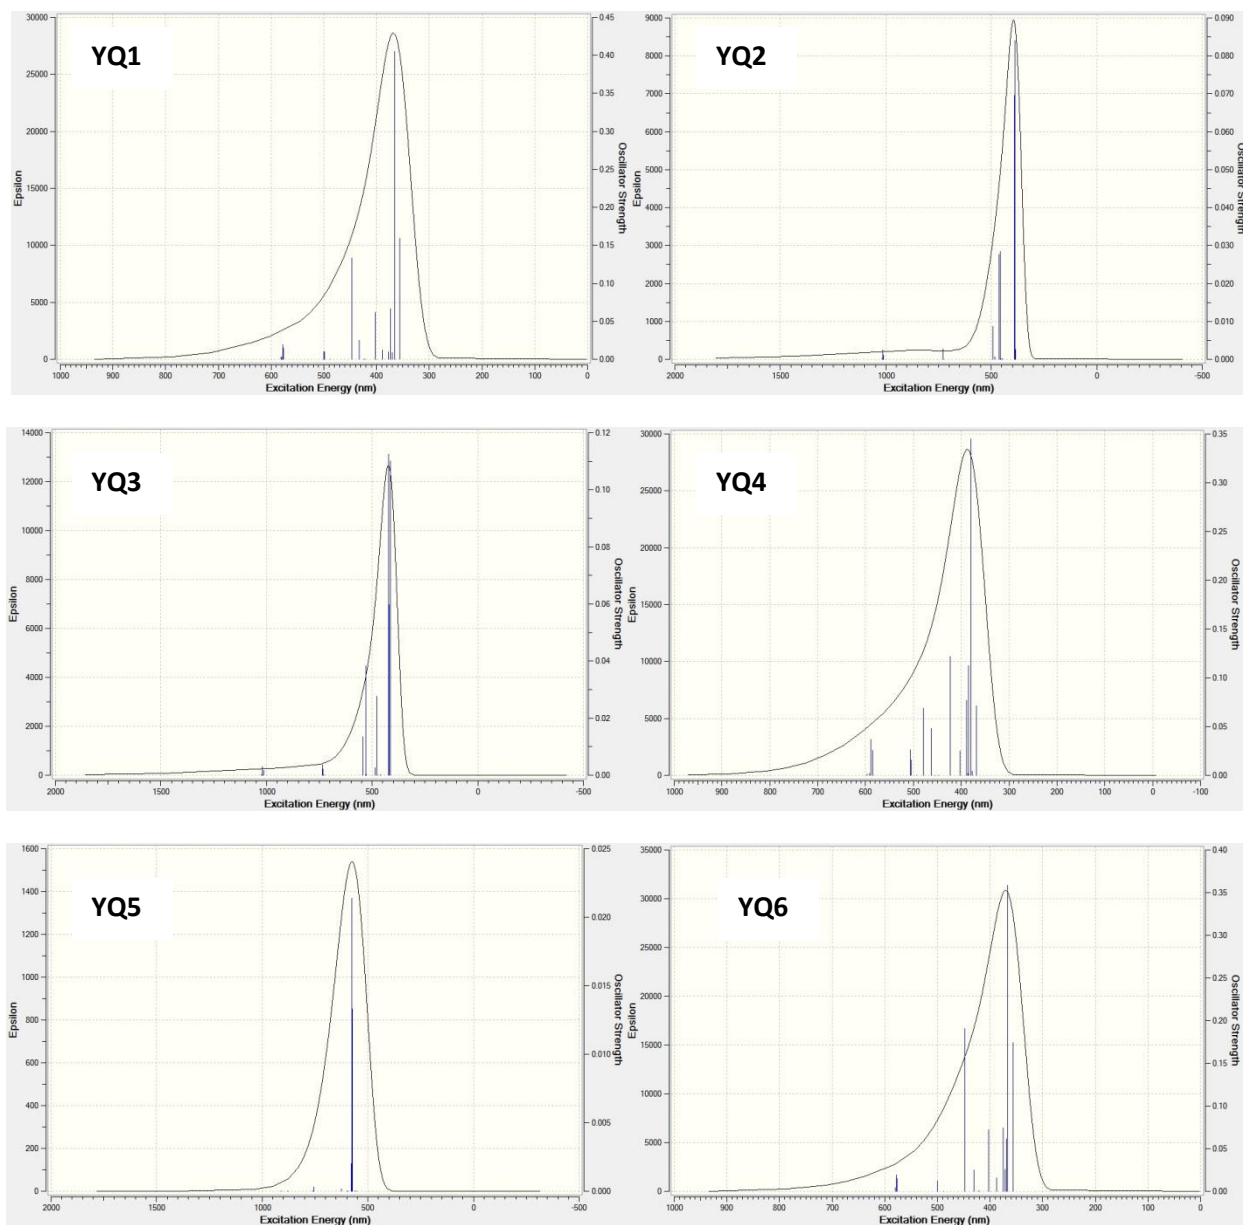

**Figure S6.** Theoretically calculated absorption spectra of chromophores **YQ1-YQ6**. The absorption spectra were obtained at TD-DFT/B3LYP/6-31+G\*\* level of theory. The spectra were plotted by using GaussView 5.



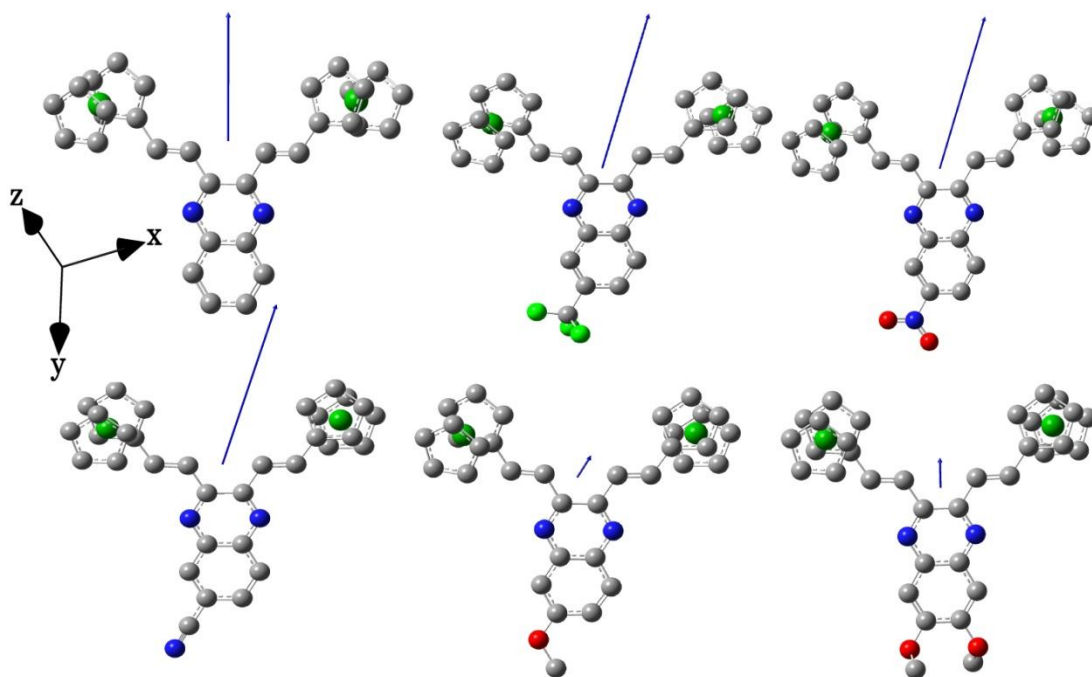

**Figure S7.** The energy minimized geometry of chromophores **YQ1-YQ6** and its dipole moment orientation at B3LYP/6-31+G\*\* level of theory.

**Table S3.** Selected transitions obtained from TD-DFT/ B3LYP/6-31+G\*\* level theory.

| Entry      | $\lambda$<br>(nm) | Oscillator<br>strength, $f$ | Energy<br>(eV) | <sup>a</sup>                                                                            |
|------------|-------------------|-----------------------------|----------------|-----------------------------------------------------------------------------------------|
| <b>YQ1</b> | 365               | 0.405                       | 3.39           | H-5 $\rightarrow$ L (55%)                                                               |
|            | 355               | 0.159                       | 3.48           | H-5 $\rightarrow$ L (31%), H-1 $\rightarrow$ L+2 (-23%)                                 |
|            | 373               | 0.066                       | 3.31           | H-4 $\rightarrow$ L (41%), H-1 $\rightarrow$ L+1 (26%), H-6 $\rightarrow$ L (21%)       |
|            | 402               | 0.061                       | 3.08           | H-4 $\rightarrow$ L (53%), H-1 $\rightarrow$ L+1 (23%)                                  |
| <b>YQ2</b> | 388               | 0.084                       | 3.19           | H $\rightarrow$ L+1 (43%), H-2 $\rightarrow$ L+1 (37%)                                  |
|            | 391               | 0.069                       | 3.16           | H-4 $\rightarrow$ L (47%), H-1 $\rightarrow$ L+1 (30%), H $\rightarrow$ L+1 (25%)       |
|            | 388               | 0.049                       | 3.18           | H-2 $\rightarrow$ L+1 (45%), H $\rightarrow$ L+1 (-30%), H-2 $\rightarrow$ L+5 (21%)    |
| <b>YQ3</b> | 422               | 0.112                       | 2.93           | H-4 $\rightarrow$ L (51%), H $\rightarrow$ L+1 (30%)                                    |
|            | 414               | 0.110                       | 2.98           | H-2 $\rightarrow$ L+1 (49%), H-4 $\rightarrow$ L (-37%)                                 |
|            | 420               | 0.059                       | 2.94           | H $\rightarrow$ L+1 (45%), H-2 $\rightarrow$ L+1 (-43%),                                |
|            | 421               | 0.012                       | 2.94           | H-1 $\rightarrow$ L+1 (53%)                                                             |
|            | 476               | 0.027                       | 2.60           | H-3 $\rightarrow$ L+3 (28%), H-2 $\rightarrow$ L (23%)                                  |
|            | 529               | 0.038                       | 2.33           | H-2 $\rightarrow$ L (58%)                                                               |
| <b>YQ4</b> | 379               | 0.344                       | 3.26           | H-5 $\rightarrow$ L (45%), H-7 $\rightarrow$ L (-37%), H $\rightarrow$ L+1 (30%)        |
|            | 422               | 0.128                       | 2.93           | H-4 $\rightarrow$ L (61%)                                                               |
|            | 384               | 0.112                       | 3.22           | H-7 $\rightarrow$ L (58%), H-5 $\rightarrow$ L (25%), H $\rightarrow$ L+1 (21%)         |
|            | 388               | 0.077                       | 3.18           | H-1 $\rightarrow$ L+1 (34%), H-4 $\rightarrow$ L (28%), H-6 $\rightarrow$ L (-21)       |
|            | 367               | 0.071                       | 3.37           | H-5 $\rightarrow$ L (32%), H-5 $\rightarrow$ L (-22%), H $\rightarrow$ L+1 (27%)        |
| <b>YQ5</b> | 574               | 0.021                       | 2.15           | H-1 $\rightarrow$ L+3 (26%), H-2 $\rightarrow$ L+5 (-25%), H-3 $\rightarrow$ L+3 (-24%) |
|            | 573               | 0.013                       | 2.16           | H-1 $\rightarrow$ L+7 (-30%), H-3 $\rightarrow$ L+4 (24%), H-1 $\rightarrow$ L+6 (-27%) |
|            | 578               | 0.002                       | 2.14           | H-3 $\rightarrow$ L+6 (30%), H-2 $\rightarrow$ L+7 (26%), H-2 $\rightarrow$ L+3 (30%)   |
|            | 577               | 0.001                       | 2.14           | H-3 $\rightarrow$ L+7 (-30%), H-3 $\rightarrow$ L+3 (29%), H-2 $\rightarrow$ L+1 (29%)  |
| <b>YQ6</b> | 366               | 0.358                       | 3.38           | H-5 $\rightarrow$ L (50%), H $\rightarrow$ L+1 (-33%)                                   |
|            | 356               | 0.174                       | 3.48           | H $\rightarrow$ L+1 (36%), H-5 $\rightarrow$ L (32%), H-1 $\rightarrow$ L+2 (22%)       |
|            | 447               | 0.191                       | 2.76           | H $\rightarrow$ L (63%)                                                                 |
|            | 374               | 0.074                       | 3.31           | H-4 $\rightarrow$ L (39%), H-1 $\rightarrow$ L+1 (27%), H-6 $\rightarrow$ L (-21%)      |
|            | 402               | 0.072                       | 3.07           | H-4 $\rightarrow$ L (55%), H-1 $\rightarrow$ L+1 (20%)                                  |

<sup>a</sup> H = HOMO; L = LUMO; only contributions above 10% are included.

**Table S4.** Density surfaces of the frontier orbitals involved in electronic transitions of chromophores **YQ1-YQ6** which is derived from TD-DFT/B3LYP/6-31+G\*\* level of theory using isosurface value of 0.02 au.

| Orbitals | YQ1                                                                                 | YQ2                                                                                  | YQ3                                                                                   |
|----------|-------------------------------------------------------------------------------------|--------------------------------------------------------------------------------------|---------------------------------------------------------------------------------------|
| HOMO-5   | 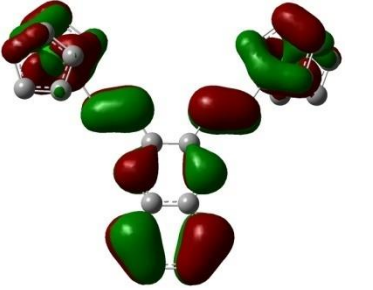   |    |    |
| HOMO-4   |   |   |   |
| HOMO-3   |  |  |  |
| HOMO-2   |  |  |  |

|        |                                                                                     |                                                                                      |                                                                                       |
|--------|-------------------------------------------------------------------------------------|--------------------------------------------------------------------------------------|---------------------------------------------------------------------------------------|
| HOMO-1 | 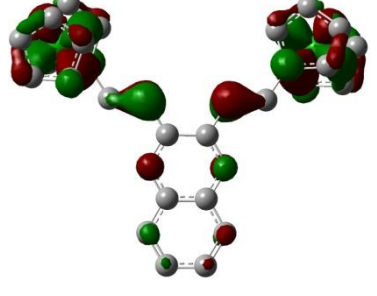   |    |    |
| HOMO   |    |    |    |
| LUMO   |   |   |   |
| LUMO+1 |  |  |  |
| LUMO+2 |  |  |  |

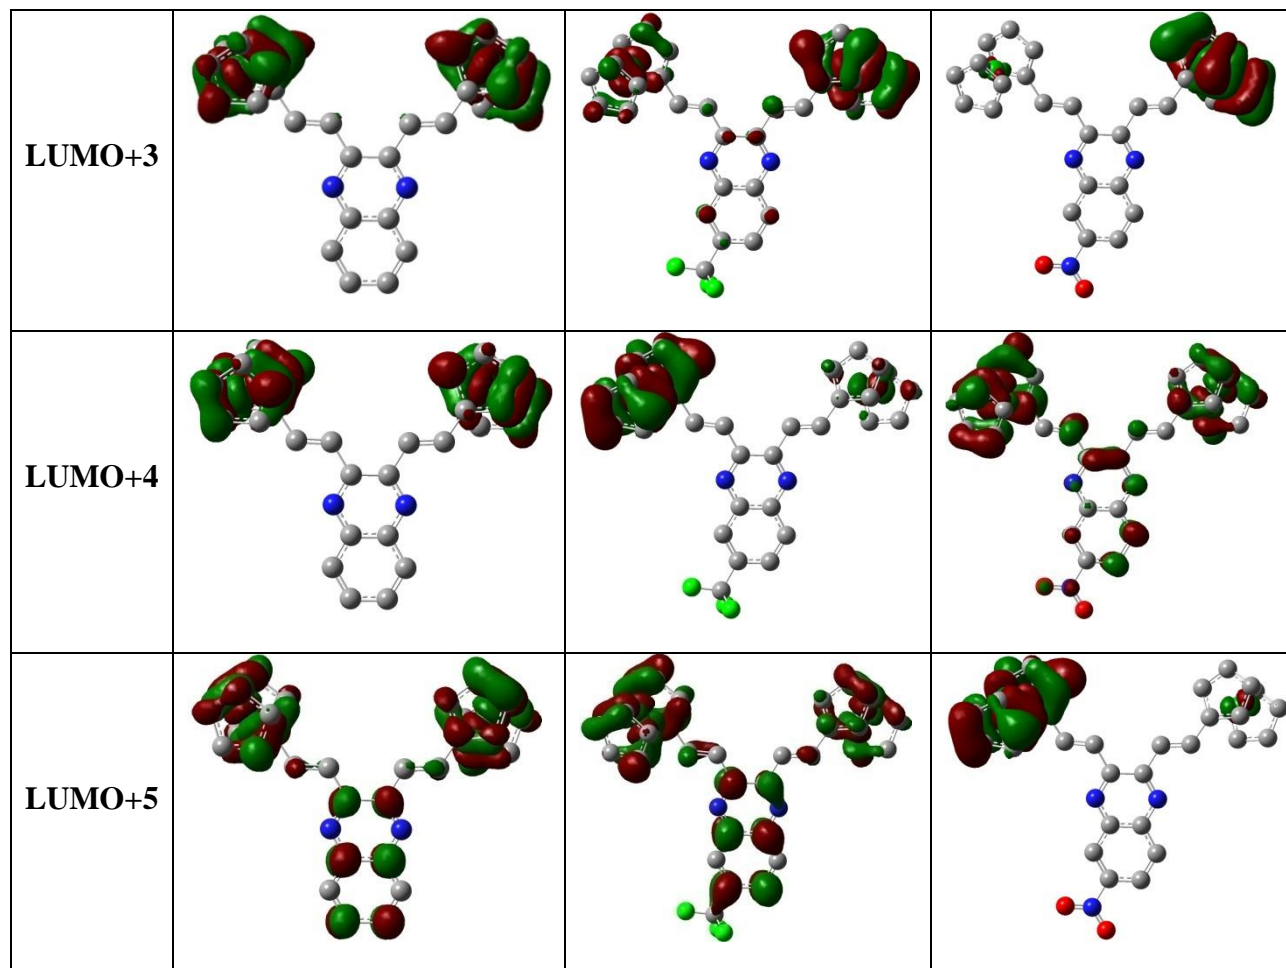

| Orbitals | YQ4                                                                                 | YQ5                                                                                  | YQ6                                                                                   |
|----------|-------------------------------------------------------------------------------------|--------------------------------------------------------------------------------------|---------------------------------------------------------------------------------------|
| HOMO-5   | 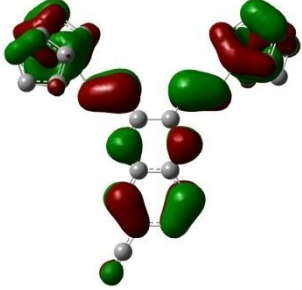   |    |    |
| HOMO-4   |    |    |    |
| HOMO-3   |   |   |   |
| HOMO-2   |  |  |  |
| HOMO-1   |  |  |  |



|        |  |  |  |
|--------|--|--|--|
| HOMO   |  |  |  |
| LUMO   |  |  |  |
| LUMO+1 |  |  |  |
| LUMO+2 |  |  |  |
| LUMO+3 |  |  |  |

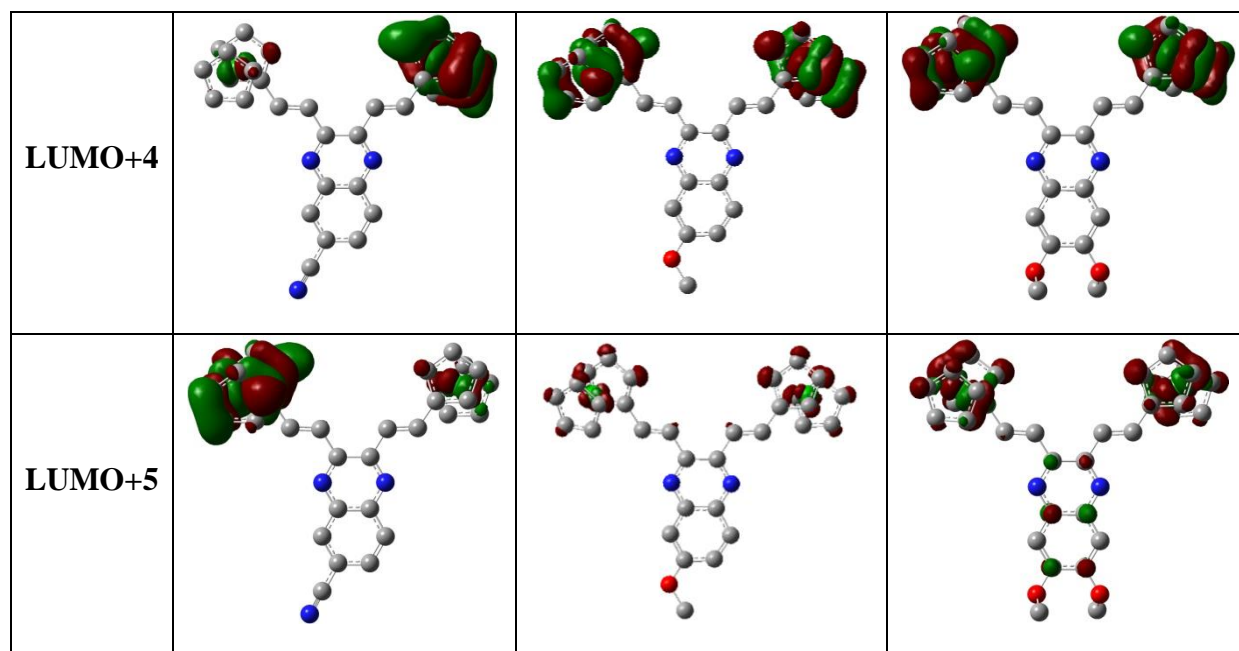



Cartesian coordinates and total energies of the optimized geometries of chromophores **YQ1-YQ6** at B3LYP/6-31+G\*\* level of theory. Atom coordinates (in Å) and total energies (in hartrees)

### YQ1

Total energy = -3871.9176055

| Center Number | Atoms | Coordinates (Angstroms) |          |          |
|---------------|-------|-------------------------|----------|----------|
|               |       | X                       | Y        | Z        |
| 1             | Fe    | 5.053391                | -1.49306 | -0.05023 |
| 2             | Fe    | -5.05691                | -1.49018 | 0.051045 |
| 3             | N     | 1.348166                | 2.866533 | -0.40183 |
| 4             | N     | -1.34251                | 2.869317 | 0.401895 |
| 5             | C     | 3.453439                | -0.78986 | -1.18554 |
| 6             | C     | 4.657906                | -0.85258 | -1.97214 |
| 7             | H     | 5.129487                | -0.008   | -2.45754 |
| 8             | C     | 5.116197                | -2.20073 | -1.99627 |
| 9             | H     | 6.005847                | -2.56157 | -2.49453 |
| 10            | C     | 4.213886                | -2.98601 | -1.21415 |
| 11            | H     | 4.303521                | -4.04521 | -1.01321 |
| 12            | C     | 3.199285                | -2.12312 | -0.70693 |
| 13            | H     | 2.386796                | -2.42121 | -0.05827 |
| 14            | C     | 5.31031                 | -0.24559 | 1.587229 |
| 15            | H     | 4.689422                | 0.613609 | 1.803626 |
| 16            | C     | 6.487314                | -0.24786 | 0.777581 |
| 17            | H     | 6.918823                | 0.611318 | 0.281856 |
| 18            | C     | 6.975559                | -1.58885 | 0.712174 |
| 19            | H     | 7.839966                | -1.92438 | 0.155025 |
| 20            | C     | 6.09862                 | -2.41566 | 1.47907  |
| 21            | H     | 6.184205                | -3.48645 | 1.606862 |
| 22            | C     | 5.069107                | -1.58446 | 2.019917 |
| 23            | H     | 4.238866                | -1.91499 | 2.629468 |
| 24            | C     | 2.680885                | 0.421184 | -0.95527 |
| 25            | H     | 3.138897                | 1.354996 | -1.27323 |
| 26            | C     | 1.444458                | 0.476034 | -0.41182 |
| 27            | H     | 0.967259                | -0.44802 | -0.10842 |
| 28            | C     | 0.701627                | 1.725204 | -0.20548 |
| 29            | C     | 0.687475                | 4.034868 | -0.21008 |
| 30            | C     | 1.355093                | 5.271426 | -0.41524 |
| 31            | H     | 2.39286                 | 5.246263 | -0.73281 |
| 32            | C     | 0.685085                | 6.459182 | -0.20967 |
| 33            | H     | 1.196168                | 7.404527 | -0.36657 |

|    |   |          |          |          |
|----|---|----------|----------|----------|
| 34 | C | -0.67233 | 6.460617 | 0.208662 |
| 35 | H | -1.18132 | 7.407037 | 0.365846 |
| 36 | C | -1.34489 | 5.274264 | 0.414012 |
| 37 | H | -2.38262 | 5.251247 | 0.731873 |
| 38 | C | -0.67977 | 4.036295 | 0.209163 |
| 39 | C | -0.69818 | 1.726647 | 0.206254 |
| 40 | C | -1.44284 | 0.478782 | 0.414458 |
| 41 | H | -0.96198 | -0.44738 | 0.123671 |
| 42 | C | -2.68405 | 0.426747 | 0.947113 |
| 43 | H | -3.14648 | 1.362212 | 1.253472 |
| 44 | C | -3.45526 | -0.78451 | 1.181409 |
| 45 | C | -3.20106 | -2.11825 | 0.704539 |
| 46 | H | -2.39101 | -2.41591 | 0.052584 |
| 47 | C | -4.21407 | -2.98117 | 1.215077 |
| 48 | H | -4.30401 | -4.04061 | 1.015546 |
| 49 | C | -5.11523 | -2.19528 | 1.998034 |
| 50 | H | -6.00317 | -2.55603 | 2.499458 |
| 51 | C | -4.65807 | -0.84682 | 1.970688 |
| 52 | H | -5.12875 | -0.00199 | 2.45655  |
| 53 | C | -5.34591 | -0.21651 | -1.55999 |
| 54 | H | -4.7529  | 0.667206 | -1.75469 |
| 55 | C | -5.0575  | -1.53694 | -2.0201  |
| 56 | H | -4.213   | -1.82636 | -2.63102 |
| 57 | C | -6.06172 | -2.41342 | -1.50407 |
| 58 | H | -6.11076 | -3.48346 | -1.65501 |
| 59 | C | -6.97006 | -1.63337 | -0.7246  |
| 60 | H | -7.82635 | -2.00947 | -0.18101 |
| 61 | C | -6.52666 | -0.27555 | -0.75811 |
| 62 | H | -6.98992 | 0.557631 | -0.24684 |

## YQ2

Absolute energies = -4208.9303772

| Center<br>Number | Atoms | Coordinates (Angstroms) |          |          |
|------------------|-------|-------------------------|----------|----------|
|                  |       | X                       | Y        | Z        |
| 1                | Fe    | 5.727293                | -1.39955 | -0.05527 |
| 2                | Fe    | -4.80114                | -2.88777 | 0.099824 |
| 3                | N     | 1.230974                | 2.0211   | -0.43902 |
| 4                | N     | -1.43012                | 1.658105 | 0.233455 |
| 5                | C     | 3.804991                | -1.34212 | -1.13858 |
| 6                | C     | 4.867996                | -1.35745 | -2.07473 |

|    |   |          |          |          |
|----|---|----------|----------|----------|
| 7  | H | 5.081956 | -0.58303 | -2.78499 |
| 8  | C | 5.581354 | -2.55839 | -1.91892 |
| 9  | H | 6.441494 | -2.85829 | -2.48342 |
| 10 | C | 4.971778 | -3.29319 | -0.88189 |
| 11 | H | 5.290575 | -4.2482  | -0.5143  |
| 12 | C | 3.883715 | -2.54592 | -0.39707 |
| 13 | H | 3.237054 | -2.83571 | 0.406874 |
| 14 | C | 6.005791 | 0.287246 | 1.310047 |
| 15 | H | 5.27244  | 1.05952  | 1.431337 |
| 16 | C | 7.060134 | 0.283804 | 0.375399 |
| 17 | H | 7.271581 | 1.055577 | -0.33789 |
| 18 | C | 7.78108  | -0.91677 | 0.534168 |
| 19 | H | 8.639503 | -1.21656 | -0.03344 |
| 20 | C | 7.173606 | -1.65444 | 1.570786 |
| 21 | H | 7.487713 | -2.61515 | 1.927791 |
| 22 | C | 6.077154 | -0.91101 | 2.049735 |
| 23 | H | 5.40925  | -1.20697 | 2.834111 |
| 24 | C | 2.830082 | -0.25463 | -1.01211 |
| 25 | H | 3.078669 | 0.661845 | -1.51884 |
| 26 | C | 1.679994 | -0.31501 | -0.35065 |
| 27 | H | 1.392775 | -1.22458 | 0.141422 |
| 28 | C | 0.758002 | 0.833571 | -0.24232 |
| 29 | C | 0.405004 | 3.083501 | -0.31243 |
| 30 | C | 0.899759 | 4.394036 | -0.52468 |
| 31 | H | 1.931703 | 4.511215 | -0.79827 |
| 32 | C | 0.075404 | 5.461344 | -0.37815 |
| 33 | H | 0.443773 | 6.458357 | -0.537   |
| 34 | C | -1.28279 | 5.270836 | -0.01127 |
| 35 | C | -1.7796  | 4.024184 | 0.196173 |
| 36 | H | -2.80323 | 3.858882 | 0.470354 |
| 37 | C | -0.93159 | 2.900483 | 0.04646  |
| 38 | C | -0.64423 | 0.64124  | 0.094871 |
| 39 | C | -1.20961 | -0.7123  | 0.270018 |
| 40 | H | -0.684   | -1.52812 | -0.18869 |
| 41 | C | -2.32681 | -0.9435  | 0.949504 |
| 42 | H | -2.81755 | -0.11022 | 1.422209 |
| 43 | C | -2.96037 | -2.25208 | 1.139085 |
| 44 | C | -2.70854 | -3.46168 | 0.447367 |
| 45 | H | -2.01468 | -3.59553 | -0.35833 |
| 46 | C | -3.54149 | -4.4595  | 0.984162 |
| 47 | H | -3.58592 | -5.48053 | 0.661142 |
| 48 | C | -4.32143 | -3.87789 | 2.00409  |
| 49 | H | -5.05915 | -4.37941 | 2.59797  |

|    |   |          |          |          |
|----|---|----------|----------|----------|
| 50 | C | -3.96838 | -2.52058 | 2.097329 |
| 51 | H | -4.38262 | -1.8055  | 2.780731 |
| 52 | C | -5.56909 | -1.39256 | -1.30086 |
| 53 | H | -5.0974  | -0.4412  | -1.44697 |
| 54 | C | -5.28466 | -2.57619 | -2.01225 |
| 55 | H | -4.56086 | -2.68072 | -2.79592 |
| 56 | C | -6.11116 | -3.59847 | -1.50608 |
| 57 | H | -6.12805 | -4.61758 | -1.83807 |
| 58 | C | -6.90723 | -3.04791 | -0.48091 |
| 59 | H | -7.63731 | -3.57389 | 0.101549 |
| 60 | C | -6.57314 | -1.68441 | -0.35641 |
| 61 | H | -7.00175 | -0.99216 | 0.340865 |
| 62 | C | -2.14831 | 6.48821  | 0.137524 |
| 63 | F | -3.38929 | 6.189188 | 0.479061 |
| 64 | F | -2.20642 | 7.182803 | -0.99022 |
| 65 | F | -1.67277 | 7.311232 | 1.061809 |

### YQ3

Absolute energies = -4076.3791172

| Center<br>Number | Atoms | Coordinates (Angstroms) |          |          |
|------------------|-------|-------------------------|----------|----------|
|                  |       | X                       | Y        | Z        |
| 1                | Fe    | 5.566409                | -1.4908  | -0.05124 |
| 2                | Fe    | -5.01934                | -2.37533 | 0.095406 |
| 3                | N     | 1.280846                | 2.19278  | -0.44182 |
| 4                | N     | -1.39739                | 1.968449 | 0.237369 |
| 5                | C     | 3.669777                | -1.29325 | -1.16386 |
| 6                | C     | 4.746456                | -1.34382 | -2.08342 |
| 7                | H     | 5.0167                  | -0.56393 | -2.768   |
| 8                | C     | 5.386197                | -2.58774 | -1.95072 |
| 9                | H     | 6.237453                | -2.92134 | -2.50968 |
| 10               | C     | 4.717173                | -3.31465 | -0.94497 |
| 11               | H     | 4.974207                | -4.29637 | -0.60019 |
| 12               | C     | 3.665681                | -2.51998 | -0.45607 |
| 13               | H     | 2.98905                 | -2.79471 | 0.328219 |
| 14               | C     | 5.920713                | 0.137873 | 1.365214 |
| 15               | H     | 5.234024                | 0.950091 | 1.498054 |
| 16               | C     | 6.989507                | 0.09659  | 0.447872 |
| 17               | H     | 7.259394                | 0.873536 | -0.23961 |
| 18               | C     | 7.634241                | -1.14909 | 0.583626 |
| 19               | H     | 8.48323                 | -1.48421 | 0.021667 |

|    |   |          |          |          |
|----|---|----------|----------|----------|
| 20 | C | 6.965559 | -1.8771  | 1.589234 |
| 21 | H | 7.215487 | -2.86432 | 1.923849 |
| 22 | C | 5.907575 | -1.08238 | 2.071791 |
| 23 | H | 5.209782 | -1.35894 | 2.836992 |
| 24 | C | 2.757563 | -0.15578 | -1.02277 |
| 25 | H | 3.063105 | 0.755459 | -1.5072  |
| 26 | C | 1.597454 | -0.16425 | -0.37454 |
| 27 | H | 1.252335 | -1.06508 | 0.095102 |
| 28 | C | 0.743373 | 1.032362 | -0.25454 |
| 29 | C | 0.515322 | 3.299405 | -0.30215 |
| 30 | C | 1.083216 | 4.57939  | -0.50452 |
| 31 | H | 2.118797 | 4.639777 | -0.78125 |
| 32 | C | 0.326516 | 5.696642 | -0.34603 |
| 33 | H | 0.733245 | 6.676362 | -0.4927  |
| 34 | C | -1.02873 | 5.556323 | 0.023513 |
| 35 | C | -1.61327 | 4.34549  | 0.225687 |
| 36 | H | -2.64422 | 4.257259 | 0.501673 |
| 37 | C | -0.82944 | 3.185077 | 0.061238 |
| 38 | C | -0.67109 | 0.912794 | 0.086005 |
| 39 | C | -1.30754 | -0.40962 | 0.249135 |
| 40 | H | -0.83343 | -1.24672 | -0.22672 |
| 41 | C | -2.42858 | -0.58652 | 0.939163 |
| 42 | H | -2.86546 | 0.266586 | 1.429105 |
| 43 | C | -3.13313 | -1.85885 | 1.11999  |
| 44 | C | -2.95799 | -3.07189 | 0.410567 |
| 45 | H | -2.28234 | -3.23465 | -0.40521 |
| 46 | C | -3.83971 | -4.02739 | 0.945788 |
| 47 | H | -3.94604 | -5.04001 | 0.611037 |
| 48 | C | -4.57345 | -3.41559 | 1.982349 |
| 49 | H | -5.3315  | -3.88216 | 2.579043 |
| 50 | C | -4.1434  | -2.08187 | 2.08766  |
| 51 | H | -4.50833 | -1.35338 | 2.784844 |
| 52 | C | -5.72277 | -0.82076 | -1.27348 |
| 53 | H | -5.20493 | 0.107402 | -1.41219 |
| 54 | C | -5.50878 | -2.00666 | -2.00563 |
| 55 | H | -4.80046 | -2.13684 | -2.79954 |
| 56 | C | -6.38183 | -2.99203 | -1.50468 |
| 57 | H | -6.45594 | -4.00359 | -1.85152 |
| 58 | C | -7.13672 | -2.41623 | -0.46214 |
| 59 | H | -7.88708 | -2.91208 | 0.120945 |
| 60 | C | -6.73047 | -1.07419 | -0.32172 |
| 61 | H | -7.11473 | -0.37109 | 0.390374 |
| 62 | N | -1.83317 | 6.760199 | 0.192454 |

|    |   |          |          |          |
|----|---|----------|----------|----------|
| 63 | O | -1.29915 | 7.811268 | 0.002712 |
| 64 | O | -2.97645 | 6.628519 | 0.51016  |

#### YQ4

Absolute energies = -3964.1623033

| Center<br>Number | Atoms | Coordinates (Angstroms) |          |          |
|------------------|-------|-------------------------|----------|----------|
|                  |       | X                       | Y        | Z        |
| 1                | Fe    | -4.92333                | -2.04191 | 0.064113 |
| 2                | Fe    | 5.21307                 | -1.51929 | -0.00508 |
| 3                | N     | -1.37405                | 2.390861 | 0.319027 |
| 4                | N     | 1.289906                | 2.507739 | -0.5688  |
| 5                | C     | -3.30795                | -1.33656 | 1.167537 |
| 6                | C     | -4.48842                | -1.43937 | 1.987395 |
| 7                | H     | -4.96046                | -0.61491 | 2.505816 |
| 8                | C     | -4.91833                | -2.79632 | 1.994881 |
| 9                | H     | -5.78517                | -3.18645 | 2.511044 |
| 10               | C     | -4.02393                | -3.54669 | 1.1702   |
| 11               | H     | -4.10082                | -4.60266 | 0.948289 |
| 12               | C     | -3.04101                | -2.65439 | 0.652917 |
| 13               | H     | -2.2446                 | -2.92098 | -0.02851 |
| 14               | C     | -5.25685                | -0.75572 | -1.52987 |
| 15               | H     | -4.66534                | 0.126219 | -1.73725 |
| 16               | C     | -6.41152                | -0.81297 | -0.69094 |
| 17               | H     | -6.85447                | 0.019987 | -0.16169 |
| 18               | C     | -6.86169                | -2.16808 | -0.65196 |
| 19               | H     | -7.70316                | -2.54241 | -0.08453 |
| 20               | C     | -5.98344                | -2.9485  | -1.46454 |
| 21               | H     | -6.04491                | -4.01709 | -1.62134 |
| 22               | C     | -4.99064                | -2.07477 | -2.00657 |
| 23               | H     | -4.16787                | -2.36523 | -2.64607 |
| 24               | C     | -2.5824                 | -0.10166 | 0.922624 |
| 25               | H     | -3.06572                | 0.815246 | 1.252603 |
| 26               | C     | -1.36332                | -0.00041 | 0.344786 |
| 27               | H     | -0.85814                | -0.90394 | 0.02581  |
| 28               | C     | -0.68386                | 1.277981 | 0.11532  |
| 29               | C     | -0.76884                | 3.585003 | 0.098502 |
| 30               | C     | -1.48433                | 4.78549  | 0.324155 |
| 31               | H     | -2.50632                | 4.725234 | 0.68231  |
| 32               | C     | -0.87222                | 6.008598 | 0.085367 |
| 33               | C     | 0.472391                | 6.067993 | -0.39157 |

|    |   |          |          |          |
|----|---|----------|----------|----------|
| 34 | H | 0.925501 | 7.036891 | -0.57158 |
| 35 | C | 1.178808 | 4.908459 | -0.61415 |
| 36 | H | 2.202995 | 4.930521 | -0.97216 |
| 37 | C | 0.579059 | 3.643893 | -0.37175 |
| 38 | C | 0.709086 | 1.339103 | -0.32939 |
| 39 | C | 1.511221 | 0.12791  | -0.51413 |
| 40 | H | 1.087789 | -0.81222 | -0.18229 |
| 41 | C | 2.750744 | 0.131749 | -1.05763 |
| 42 | H | 3.148429 | 1.081958 | -1.40692 |
| 43 | C | 3.609724 | -1.027   | -1.23125 |
| 44 | C | 3.453171 | -2.35262 | -0.69091 |
| 45 | H | 2.646455 | -2.68803 | -0.05329 |
| 46 | C | 4.559091 | -3.14458 | -1.11465 |
| 47 | H | 4.734672 | -4.17929 | -0.85239 |
| 48 | C | 5.419878 | -2.32266 | -1.90612 |
| 49 | H | 6.358274 | -2.62723 | -2.34931 |
| 50 | C | 4.845818 | -1.02182 | -1.97224 |
| 51 | H | 5.260282 | -0.16463 | -2.48643 |
| 52 | C | 5.313504 | -0.13944 | 1.537902 |
| 53 | H | 4.629277 | 0.690957 | 1.648821 |
| 54 | C | 5.126931 | -1.4536  | 2.063717 |
| 55 | H | 4.285902 | -1.78685 | 2.656783 |
| 56 | C | 6.229552 | -2.25861 | 1.640966 |
| 57 | H | 6.369034 | -3.30937 | 1.856906 |
| 58 | C | 7.096968 | -1.44088 | 0.854007 |
| 59 | H | 8.008002 | -1.76433 | 0.368469 |
| 60 | C | 6.530138 | -0.13102 | 0.788991 |
| 61 | H | 6.93904  | 0.712606 | 0.249349 |
| 62 | C | -1.59009 | 7.22844  | 0.316079 |
| 63 | N | -2.16091 | 8.22648  | 0.49928  |

## YQ5

Absolute energies = -3985.7580622

| Center<br>Number | Atoms | Coordinates (Angstroms) |          |          |
|------------------|-------|-------------------------|----------|----------|
|                  |       | X                       | Y        | Z        |
| 1                | Fe    | -5.02683                | -2.0647  | 0.07026  |
| 2                | Fe    | 5.292393                | -1.59238 | -0.01272 |
| 3                | N     | -1.37305                | 2.223115 | 0.292418 |
| 4                | N     | 1.304657                | 2.359145 | -0.54286 |
| 5                | C     | -3.27983                | -1.54095 | 1.070925 |

|    |   |          |          |          |
|----|---|----------|----------|----------|
| 6  | C | -4.37008 | -1.7215  | 1.993982 |
| 7  | H | -4.75738 | -0.95945 | 2.657755 |
| 8  | C | -4.84603 | -3.05893 | 1.879514 |
| 9  | H | -5.66878 | -3.49061 | 2.433464 |
| 10 | C | -4.0707  | -3.71768 | 0.875758 |
| 11 | H | -4.20845 | -4.73444 | 0.532588 |
| 12 | C | -3.1148  | -2.78783 | 0.371833 |
| 13 | H | -2.40542 | -2.98129 | -0.42156 |
| 14 | C | -5.50052 | -0.53489 | -1.24542 |
| 15 | H | -4.92789 | 0.377467 | -1.34549 |
| 16 | C | -6.57895 | -0.75345 | -0.33426 |
| 17 | H | -6.975   | -0.03087 | 0.366811 |
| 18 | C | -7.02074 | -2.10366 | -0.48855 |
| 19 | H | -7.80867 | -2.58364 | 0.076547 |
| 20 | C | -6.21379 | -2.71956 | -1.49401 |
| 21 | H | -6.2848  | -3.74727 | -1.82427 |
| 22 | C | -5.274   | -1.74929 | -1.96137 |
| 23 | H | -4.50871 | -1.91273 | -2.70822 |
| 24 | C | -2.54013 | -0.29989 | 0.896976 |
| 25 | H | -2.97795 | 0.590398 | 1.343181 |
| 26 | C | -1.36144 | -0.1683  | 0.249526 |
| 27 | H | -0.89143 | -1.04914 | -0.17316 |
| 28 | C | -0.6739  | 1.117289 | 0.07442  |
| 29 | C | -0.77296 | 3.427196 | 0.109218 |
| 30 | C | -1.50537 | 4.616503 | 0.347296 |
| 31 | H | -2.53404 | 4.54988  | 0.687351 |
| 32 | C | -0.91326 | 5.855877 | 0.145318 |
| 33 | C | 0.420606 | 5.85828  | -0.30438 |
| 34 | C | 1.187704 | 4.766503 | -0.55259 |
| 35 | H | 2.21777  | 4.817621 | -0.89364 |
| 36 | C | 0.587871 | 3.485834 | -0.34148 |
| 37 | C | 0.721661 | 1.184136 | -0.33641 |
| 38 | C | 1.535531 | -0.02496 | -0.50661 |
| 39 | H | 1.123034 | -0.95878 | -0.14181 |
| 40 | C | 2.767204 | -0.02556 | -1.06313 |
| 41 | H | 3.153666 | 0.917341 | -1.44378 |
| 42 | C | 3.638782 | -1.18206 | -1.2075  |
| 43 | C | 3.520716 | -2.47931 | -0.59538 |
| 44 | H | 2.741913 | -2.79101 | 0.087418 |
| 45 | C | 4.62446  | -3.27855 | -1.01442 |
| 46 | H | 4.823378 | -4.29618 | -0.70583 |
| 47 | C | 5.445906 | -2.48696 | -1.87546 |
| 48 | H | 6.372667 | -2.80129 | -2.33647 |



|    |   |          |          |          |
|----|---|----------|----------|----------|
| 49 | C | 4.848534 | -1.19897 | -1.98826 |
| 50 | H | 5.233483 | -0.36285 | -2.55754 |
| 51 | C | 5.400746 | -0.12903 | 1.44847  |
| 52 | H | 4.69887  | 0.689949 | 1.532723 |
| 53 | C | 5.260973 | -1.41644 | 2.050014 |
| 54 | H | 4.443771 | -1.73605 | 2.682769 |
| 55 | C | 6.371114 | -2.21836 | 1.640408 |
| 56 | H | 6.543214 | -3.25179 | 1.91009  |
| 57 | C | 7.19707  | -1.42512 | 0.786048 |
| 58 | H | 8.102965 | -1.75328 | 0.294027 |
| 59 | C | 6.596326 | -0.13417 | 0.665993 |
| 60 | H | 6.966789 | 0.686564 | 0.066466 |
| 61 | C | -0.97698 | 8.229074 | 0.160864 |
| 62 | H | -1.70719 | 8.999863 | 0.409158 |
| 63 | H | -0.09768 | 8.328111 | 0.807902 |
| 64 | H | -0.67141 | 8.330574 | -0.887   |
| 65 | O | -1.63662 | 6.981167 | 0.382943 |

## YQ6

Absolute energies = -4100.9657975

| Center<br>Number | Atoms | Coordinates (Angstroms) |          |          |
|------------------|-------|-------------------------|----------|----------|
|                  |       | X                       | Y        | Z        |
| 1                | Fe    | -5.06323                | -2.31536 | 0.074332 |
| 2                | Fe    | 5.063366                | -2.31564 | -0.07366 |
| 3                | N     | -1.34906                | 2.049462 | 0.389801 |
| 4                | N     | 1.347283                | 2.048756 | -0.39283 |
| 5                | C     | -3.4537                 | -1.60393 | 1.190256 |
| 6                | C     | -4.6499                 | -1.66564 | 1.989224 |
| 7                | H     | -5.11838                | -0.82024 | 2.47636  |
| 8                | C     | -5.10581                | -3.01455 | 2.023687 |
| 9                | H     | -5.98943                | -3.37461 | 2.533293 |
| 10               | C     | -4.20978                | -3.80157 | 1.236006 |
| 11               | H     | -4.29993                | -4.86175 | 1.040205 |
| 12               | C     | -3.20188                | -2.93865 | 0.715074 |
| 13               | H     | -2.3969                 | -3.23684 | 0.057075 |
| 14               | C     | -5.38072                | -1.03389 | -1.52604 |
| 15               | H     | -4.80467                | -0.13738 | -1.71333 |
| 16               | C     | -6.55903                | -1.1227  | -0.72332 |
| 17               | H     | -7.03758                | -0.30314 | -0.20405 |
| 18               | C     | -6.97578                | -2.48919 | -0.7008  |

|    |   |          |          |          |
|----|---|----------|----------|----------|
| 19 | H | -7.8236  | -2.88669 | -0.15903 |
| 20 | C | -6.05343 | -3.24471 | -1.48797 |
| 21 | H | -6.08137 | -4.31433 | -1.64739 |
| 22 | C | -5.06716 | -2.34456 | -1.99751 |
| 23 | H | -4.21734 | -2.61212 | -2.61102 |
| 24 | C | -2.68602 | -0.39212 | 0.9464   |
| 25 | H | -3.14966 | 0.543779 | 1.250151 |
| 26 | C | -1.44615 | -0.34063 | 0.41088  |
| 27 | H | -0.96423 | -1.26785 | 0.124831 |
| 28 | C | -0.70109 | 0.90621  | 0.199524 |
| 29 | C | -0.68623 | 3.214679 | 0.201916 |
| 30 | C | -1.35747 | 4.451683 | 0.385753 |
| 31 | H | -2.40192 | 4.452466 | 0.678868 |
| 32 | C | -0.69344 | 5.641469 | 0.184001 |
| 33 | C | 0.694075 | 5.641056 | -0.18465 |
| 34 | C | 1.357279 | 4.450974 | -0.38735 |
| 35 | H | 2.401755 | 4.451189 | -0.68026 |
| 36 | C | 0.685186 | 3.21429  | -0.2044  |
| 37 | C | 0.698632 | 0.905868 | -0.20289 |
| 38 | C | 1.443124 | -0.34135 | -0.41318 |
| 39 | H | 0.96019  | -1.26822 | -0.12771 |
| 40 | C | 2.684055 | -0.39386 | -0.94602 |
| 41 | H | 3.149432 | 0.541577 | -1.24859 |
| 42 | C | 3.450903 | -1.60656 | -1.1876  |
| 43 | C | 3.199876 | -2.93964 | -0.70752 |
| 44 | H | 2.396845 | -3.23525 | -0.04598 |
| 45 | C | 4.20583  | -3.80466 | -1.22881 |
| 46 | H | 4.296247 | -4.86419 | -1.02968 |
| 47 | C | 5.1003   | -3.02045 | -2.02109 |
| 48 | H | 5.982502 | -3.38237 | -2.53185 |
| 49 | C | 4.64515  | -1.67123 | -1.98929 |
| 50 | H | 5.112901 | -0.82735 | -2.47974 |
| 51 | C | 5.387798 | -1.02961 | 1.521858 |
| 52 | H | 4.814107 | -0.13134 | 1.707948 |
| 53 | C | 5.072872 | -2.33818 | 1.99825  |
| 54 | H | 4.224095 | -2.60206 | 2.614779 |
| 55 | C | 6.055873 | -3.24192 | 1.4888   |
| 56 | H | 6.082006 | -4.31111 | 1.651295 |
| 57 | C | 6.97757  | -2.49072 | 0.696765 |
| 58 | H | 7.823186 | -2.89156 | 0.154053 |
| 59 | C | 6.563673 | -1.12334 | 0.716131 |
| 60 | H | 7.042483 | -0.30635 | 0.193115 |
| 61 | C | 1.662169 | 7.570063 | 0.802931 |

|    |   |          |          |          |
|----|---|----------|----------|----------|
| 62 | H | 2.153665 | 8.486647 | 0.471794 |
| 63 | H | 0.753314 | 7.814366 | 1.361592 |
| 64 | H | 2.347806 | 6.99564  | 1.437817 |
| 65 | O | 1.353428 | 6.831284 | -0.39072 |
| 66 | C | -1.6592  | 7.573058 | -0.80108 |
| 67 | H | -2.1501  | 8.489491 | -0.46866 |
| 68 | H | -0.74984 | 7.817547 | -1.35881 |
| 69 | H | -2.34496 | 7.000284 | -1.43731 |
| 70 | O | -1.35183 | 6.831978 | 0.391509 |

---

## References

- 1 R. Chauhan, M. Shahid, M. Trivedi, D. P. Amalnerkar and A. Kumar, *Eur. J. Inorg. Chem.*, 2015, 3700–3707.
- 2 G. Sathyaraj, D. Muthamilselvan, M. Kiruthika, T. Weyhermüller and B. U. Nair, *J. Organomet. Chem.*, 2012, **716**, 150–158.
- 3 (a) A. X. S. Bruker. “APEX2-Software Suite for Crystallographic Programs.” Bruker AXS Inc., Madison, 2009. (b) A. X. S. Bruker. SAINT, Bruker AXS, Inc., Madison, WI, USA, 2009.
- 4 G. M. Sheldrick, *Acta Crystallogr. Sect. A*, 2008, **64**, 112–122.
- 5 L. Palatinus and G. Chapuis, *J. Appl. Crystallogr.*, 2007, **40**, 786–790.
- 6 O. V. Dolomanov, L. J. Bourhis, R. J. Gildea, J. a K. Howard and H. Puschmann, *J. Appl. Crystallogr.*, 2009, **42**, 339–341.
- 7 G. M. Sheldrick, SHELXTL, Bruker AXS, Inc., Madison, Wisconsin, USA, 2008.
- 8 B. F. Levine, *Appl. Phys. Lett.*, 1974, **24**, 445.
- 9 D. Marinotto, R. Castagna, S. Righetto, C. Dragonetti, A. Colombo, C. Bertarelli, M. Garbugli and G. Lanzani, *J. Phys. Chem. C*, 2011, **115**, 20425–20432.
- 10 D. Marinotto, S. Proutière, C. Dragonetti, A. Colombo, P. Ferruti, D. Pedron, M. C. Ubaldi and S. Pietralunga, *J. Non. Cryst. Solids*, 2011, **357**, 2075–2080.
- 11 R. Macchi, E. Cariati, D. Marinotto, D. Roberto, E. Tordin, R. Ugo, R. Bozio, M. Cozzuol, D. Pedron and G. Mattei, *J. Mater. Chem.*, 2010, **20**, 1885.
- 12 S. Proutière, P. Ferruti, R. Ugo, A. Abboto, R. Bozio, M. Cozzuol, C. Dragonetti, E. Emilritri, D. Locatelli, D. Marinotto, G. Pagani, D. Pedron and D. Roberto, *Mater. Sci. Eng. B*, 2008, **147**, 293–297.
- 13 W. N. Herman and L. M. Hayden, *J. Opt. Soc. Am. B*, 1995, **12**, 416.
- 14 S. Di Bella, C. Dragonetti, M. Pizzotti, D. Roberto, F. Tessore and R. Ugo, *Molecular Organometallic Materials for Optics*, Springer Berlin Heidelberg, Berlin, Heidelberg, 2010, vol. 28.
- 15 (a) R. H. Page, M. C. Jurich, B. Beck, A. Sen, R. J. Twieg, J. D. Swalen, G. C. Bjorklund, C. G. Wilson, *J. Opt. Soc. Am. B*, 1990, **7**, 1239. (b) M. A. Mortazavi, A. Knoesen, S. T. Kowel, B. G. Higgins, A. Dienes, *J. Opt. Soc. Am. B*, 1989, **6**, 733.
- 16 S. H. Vosko, L. Wilk and M. Nusair, *Can. J. Phys.*, 1980, **58**, 1200–1211.
- 17 C. Lee, W. Yang and R. G. Parr, *Phys. Rev. B*, 1988, **37**, 785–789.
- 18 P. J. Hay and W. R. Wadt, *J. Chem. Phys.*, 1985, **82**, 270–283.
- 19 D. J. Frisch, M. J.; Trucks, G. W.; Schlegel, H. B.; Scuseria, G. E.; Robb, M. A.; Cheeseman, J. R.; Scalmani, G.; Barone, V.; Mennucci, B.; Petersson, G. A.; Nakatsuji, H.; Caricato, M.; Li, X.; Hratchian, H. P.; Izmaylov, A. F.; Bloino, J.; Zheng, G.; Sonnenb, 2009.
- 20 GaussView, Version 5.0.9, R. Dennington, T. Keith, J. Millam, Semichem Inc., Shawnee Mission, KS, 2009.
